# Supplementary material for: Engineering consortia by polymeric microbial swarmbots
Source: PubMed Central journal article supplement (PMC9256712; doi:10.1038/s41467-022-31467-1), 2022-07-05
Supplement: 41467_2022_31467_MOESM3_ESM.pdf [file 41467_2022_31467_MOESM3_ESM.pdf]

**File name: Supplementary Movie 1**

**Description: The co-culture of *E. coli* and *S. cerevisiae* by MSBC platform.** The MSBC were cultured at the room temperature (~22 °C).
